# Supplementary material for: Within the Ischemic Penumbra, Sub-Cellular Compartmentalization of Heat Shock Protein 70 Overlaps with Autophagy Proteins and Fails to Merge with Lysosomes
Source: MDPI journal article supplement (doi:10.3390/molecules27103122), 2022-05-13
Supplement: s1 [file s1]

## Supplementary Figures

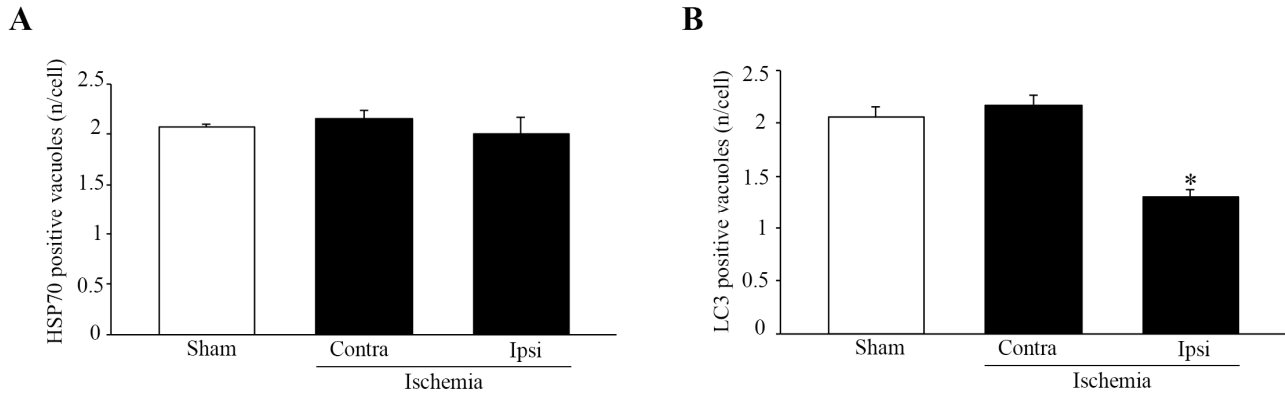

**Figure S1. Ultrastructural morphometry of Heat Shock protein 70 (HSP70) and microtubule-associated protein I/II-Light Chain 3 (LC3) positive vacuoles.**

The number of HSP70 positive vacuoles per cell remains steady in the ventral area penumbra (Ipsi/Ischemia) compared with the number counted in the homologous regions from the contralateral side (Contra/Ischemia) and from sham-operated mice (Sham) as reported in graph **A**. Graph **B** reports a decrease in the number of LC3 positive vacuoles per cell in area penumbra (Ipsi/Ischemia) compared with the number counted in the homologous regions from the contralateral side (Contra/Ischemia) and from sham-operated mice (Sham). Values are given as the mean $\pm$ S.E.M. per cell from a total of 120 cells for each group. \* $P\leq 0.05$  compared with other groups.

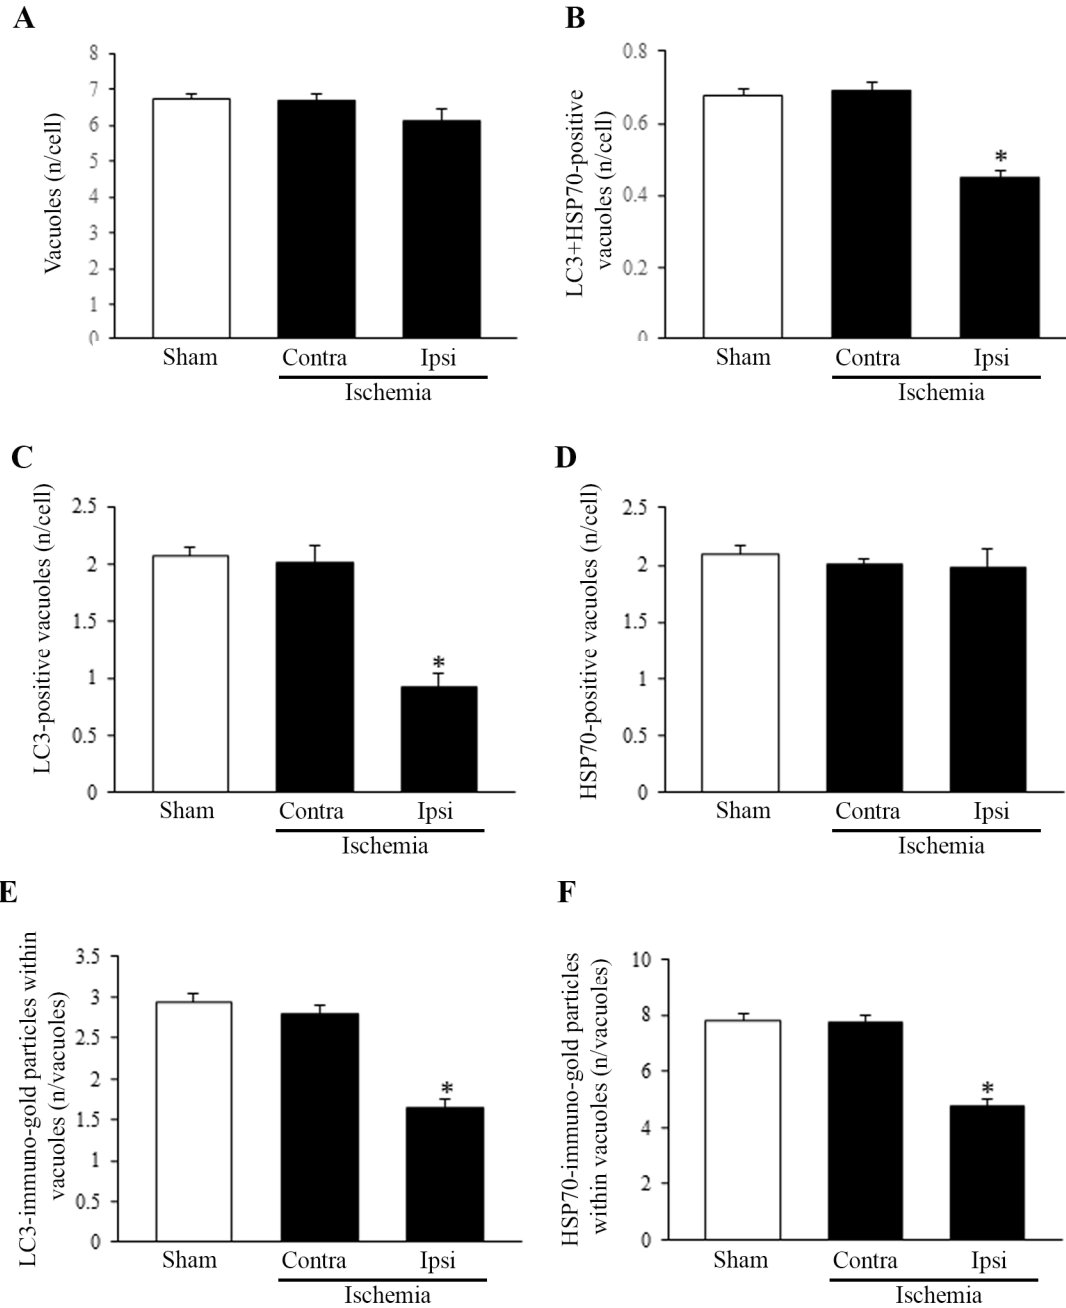

**Figure S2. Ultrastructural morphometry of vacuoles, microtubule-associated protein I/II-Light Chain 3 (LC3) and Heat Shock protein 70 (HSP70) within dorsal area penumbra.**

Graph (A) reports the number of vacuoles per cell. Graph (B) reports the number per cell of LC3+HSP70 positive vacuoles. Graphs (C) and (D) report the number of LC3 or HSP70 positive vacuoles respectively. Graphs (E) and (F) report the amount of LC3 or HSP70 particles within vacuoles, respectively. All values are counted in sham-operated mice (Sham), in the side contralateral to ischemia (Contra/Ischemia) and within area penumbra (Ipsi/Ischemia). Values are reported as the mean±S.E.M. of immuno-gold particle counted in each cell from a total of 120 cells for each group. \* $P \leq 0.05$  compared with other groups.

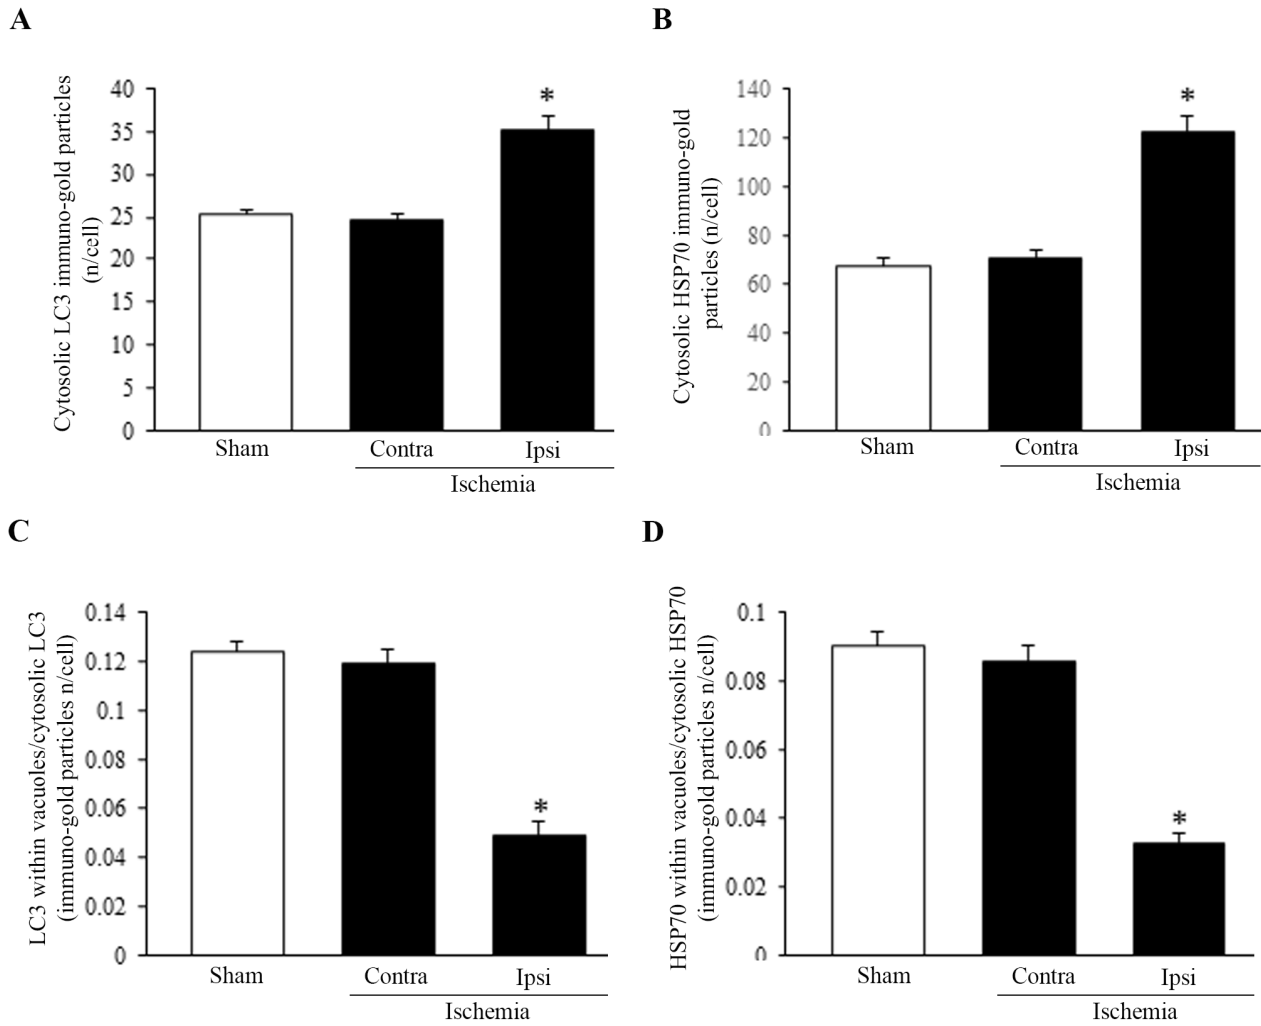

**Figure S3. Within dorsal area penumbra Heat Shock protein 70 (HSP70) and microtubule-associated protein I/II-Light Chain 3 (LC3) shift from vacuole to cytosol.**

Graphs on the left side report the amount of LC3 particles within cytosol (A), and the ratio between vacuolar and cytosolic LC3 particles (C). Similarly, graph on the right side report the amount of HSP70 particles within cytosol (B), and the ratio between vacuolar and cytosolic HSP70 particles (D). Particles are counted in sham-operated mice (Sham), in the side contralateral to ischemia (Contra/Ischemia) and within area penumbra (Ipsi/Ischemia). Values are reported as the mean±S.E.M. of immuno-gold particle counted in each cell from a total of 120 cells for each group. \*P≤0.05 compared with other groups.

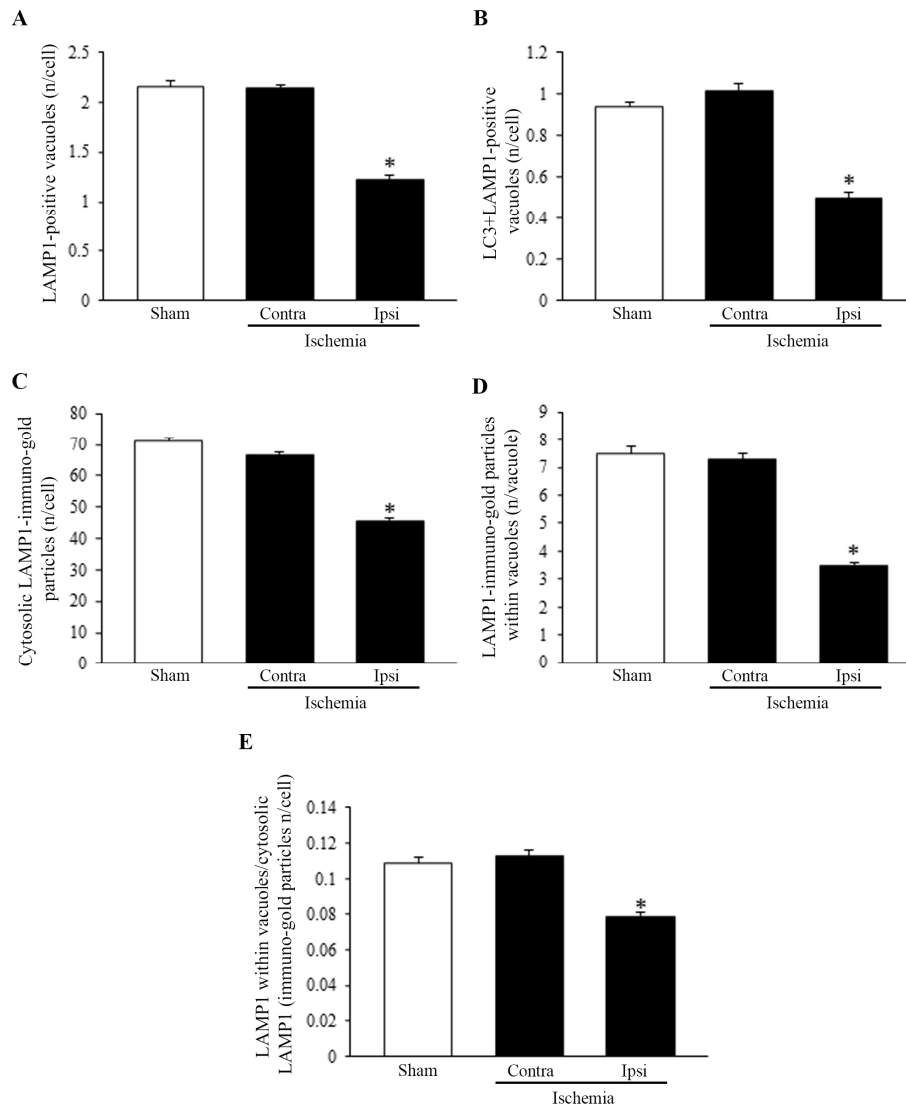

**Figure S4. Within dorsal area penumbra cells Lysosomal associated Membrane Protein 1 (LAMP1) molecules are reduced and dispersed from vacuoles concomitantly to a reduction in microtubule-associated protein I/II-Light Chain 3 (LC3)+LAMP1 co-immuno-stained vacuoles.**

Graph **A** reports the decrease in the number of LAMP1 positive vacuoles per cell. Graph **B** reports the decreased of LC3+LAMP1 positive vacuoles per cell. Graph **C** reports a reduced amount of LAMP1 molecules counted in the cytosol per cells. Graph **D** reports a massive decrease in the amount LAMP1 molecules counted within vacuoles per cell. Graph **E** reports a decrease in the ratio between vacuolar and cytosolic amount of LAMP1 molecules per cell. All graphs report the ultrastructural morphometry for LAMP1 and LC3+LAMP1 positive vacuoles from dorsal area penumbra (Ipsi/Ischemia) and from the side contralateral to ischemia (Contra/Ischemia) and from sham-operated mice (Sham). Values are reported as the mean $\pm$ S.E.M. per cell from a total of 120 cells for each group. \* $P\leq 0.05$  compared with other groups.

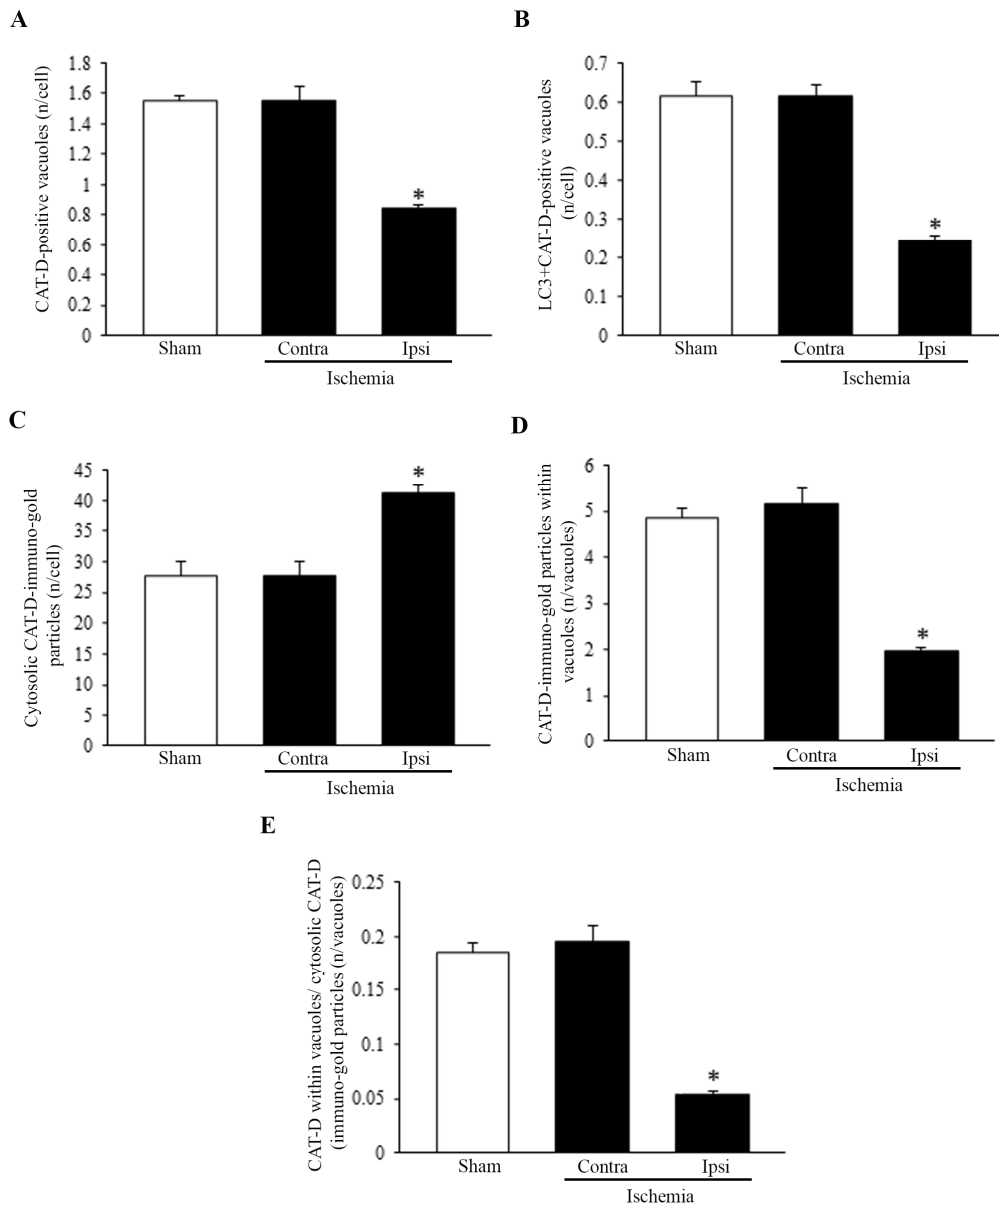

**Figure S5. Within dorsal area penumbra cells cathepsin-D (CAT-D) molecules are reduced and dispersed from vacuoles concomitantly to a reduction in microtubule-associated protein I/II-Light Chain 3 (LC3)+Lysosomal associated Membrane Protein 1 (LAMP1) co-immuno-stained vacuoles.**

Graph **A** reports the decrease in the number of CAT-D positive vacuoles per cell. Graph **B** reports the decreased in the number of LC3+CAT-D positive vacuoles per cell. Graph **C** reports an increased amount of CAT-D molecules counted in the cytosol per cells. Graph **D** reports a massive decrease in the amount CAT-D molecules counted within vacuoles. Graph **E** reports a decrease in the ratio between vacuolar and cytosolic amount of CAT-D molecules per cell. All graphs report the ultrastructural morphometry for CAT-D and LC3+CAT-D positive vacuoles from dorsal area penumbra (Ipsi/Ischemia) and the side contralateral to ischemia (Contra/Ischemia) and from sham-operated mice (Sham). Values are reported as the mean±S.E.M. per cell from a total of 120 cells for each group. \*P≤0.05 compared with other groups.

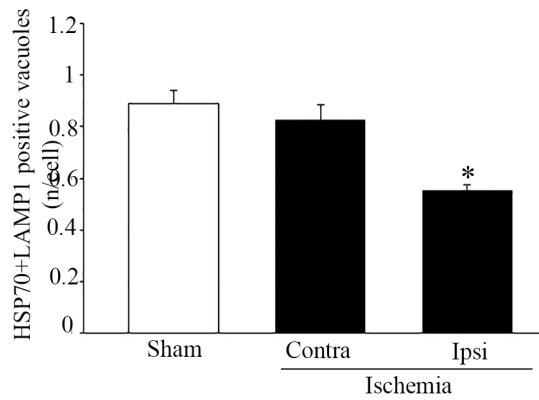

**Figure S6. Heat Shock protein 70 (HSP70)+Lysosomal associated Membrane Protein 1 (LAMP1) co-immuno-stained vacuoles decrease within dorsal area penumbra.**

Graph reports the number of HSP70+LAMP1 immuno-gold double-stained vacuoles per cell from area penumbra (Ipsi/Ischemia) and homologous regions from the contralateral side (Contra/Ischemia) and from sham-operated mice (Sham). Values are given as the mean±S.E.M. per cell from a total of 120 cells for each group. \*P≤0.05 compared with other groups.
